# Supplementary material for: Ferroelectric transistors with asymmetric double gate for memory window exceeding 12 V and disturb-free read
Source: Royal Society of Chemistry journal article supplement (doi:10.1039/d1nr05107e), 2021-01-01
Supplement: d1nr05107e1.pdf [file d1nr05107e1.pdf]

## SUPPLEMENTARY INFORMATION

# **Ferroelectric transistors with asymmetric double gate for memory window exceeding 12 V and disturb-free read**

Halid Mulaosmanovic<sup>1\*</sup>, Dominik Kleimaier<sup>2</sup>, Stefan Dünkel<sup>2</sup>, Sven Beyer<sup>2</sup>,  
Thomas Mikolajick<sup>1,3</sup> and Stefan Slesazeck<sup>1</sup>

<sup>1</sup> NaMLab gGmbH, 01187 Dresden, Germany

<sup>2</sup> GlobalFoundries, Dresden Module One LLC & Co. KG, 01109 Dresden, Germany

<sup>3</sup> Chair of Nanoelectronics, TU Dresden, 01062 Dresden, Germany

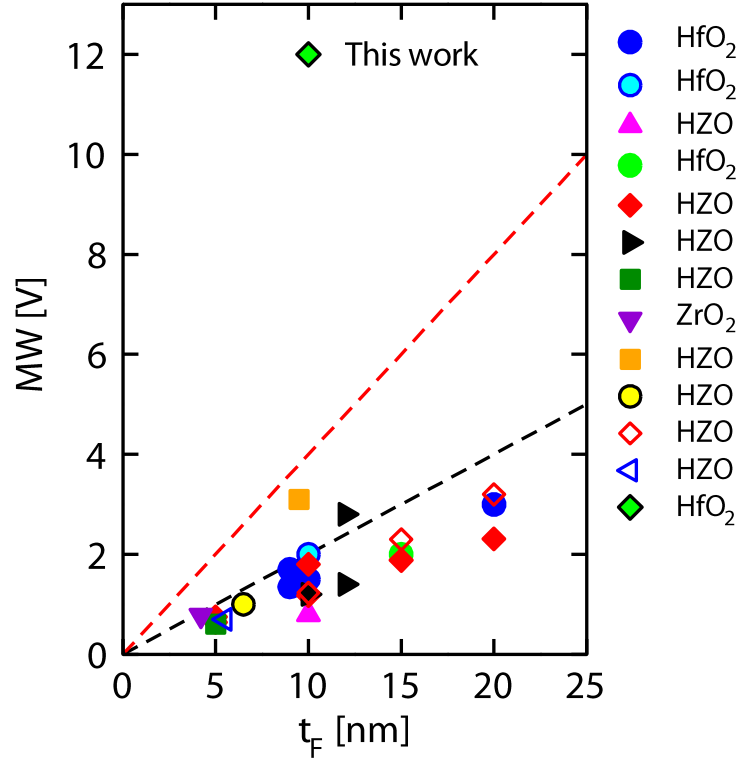

Fig. S1 MW as a function of thickness of the FE layer ( $t_F$ ). The plot shows the collection of the MW values reported across the literature for MFIS FeFETs and plotted as a function of  $t_F$  for different variants of hafnia and zirconia based FE materials. Each color/symbol corresponds to a different device/material type. The dotted lines indicate the maximum theoretical value expected from Eq. (1) for  $E_C = 1$  MV/cm and 2 MV/cm. Adapted from Ref. [1].

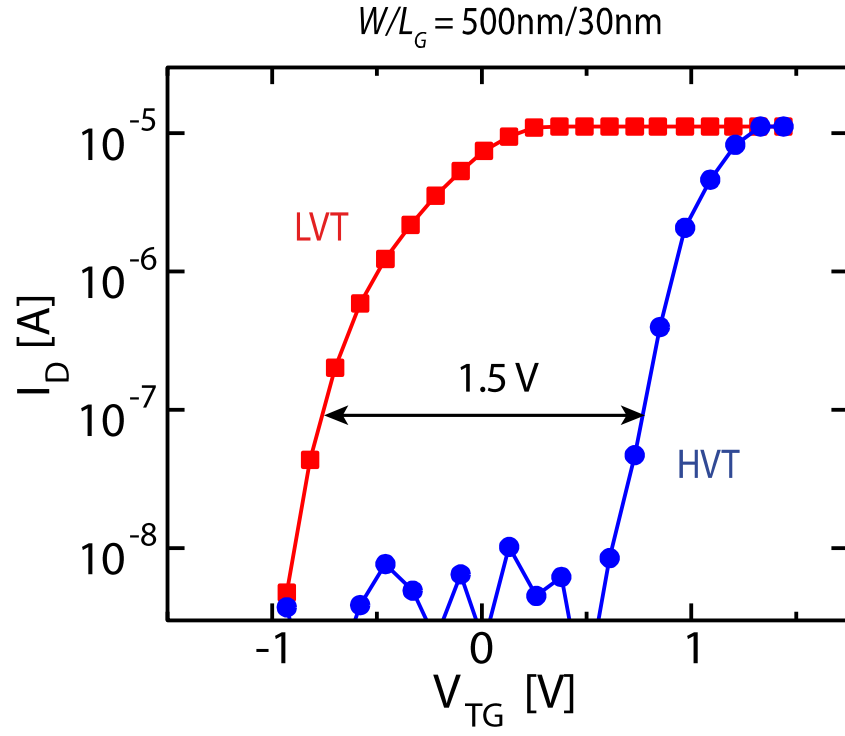

Fig. S2  $I_D - V_{TG}$  curves (top transistor) for LVT and HVT states of a device with  $W = 500$  nm and  $L_G = 30$  nm with a memory window of around 1.5 V. The corresponding  $I_D - V_{BG}$  curves are shown in Fig. 2(g) in the main text.

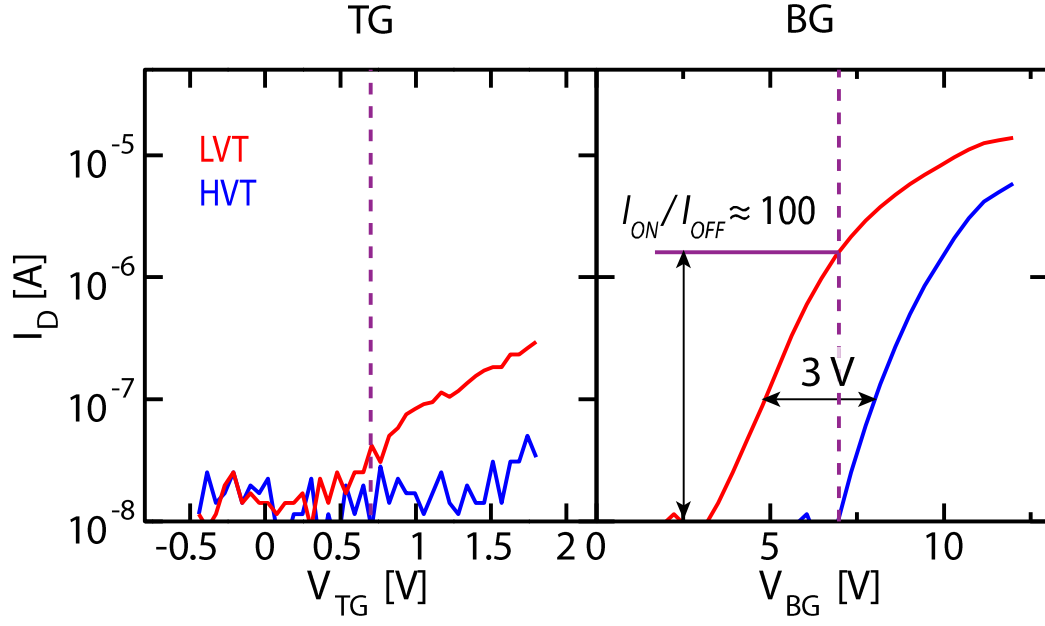

Fig. S3  $I_D - V_{TG}$  (left) and (e)  $I_D - V_{BG}$  (right) curves after  $10^5$  write cycles (taken from Fig. 3(c) in the main text). Vertical dashed lines indicate the  $V_{TG}$  and  $V_{BG}$  points at which  $I_{ON}$  and  $I_{OFF}$  in Fig. 3(d) in the main text were sampled to achieve the largest  $I_{ON}/I_{OFF}$  prior to degradation.
